# Supplementary material for: Optimized thermal desorption for improved sensitivity in trace explosives detection by ion mobility spectrometry
Source: Royal Society of Chemistry journal article supplement (doi:10.1039/c2an16145a), 2012-01-01
Supplement: c2an16145a.pdf [file c2an16145a.pdf]

## Optimized Thermal Desorption for Improved Sensitivity in Trace Explosives Detection by Ion Mobility Spectrometry

Marcela Najjarro,\*<sup>a</sup> Melissa E. Davila Morris,<sup>a</sup> Matthew E. Staymates,<sup>a</sup> Robert Fletcher,<sup>a</sup> and Greg Gillen<sup>a</sup>

<sup>a</sup> National Institute of Standards and Technology, 100 Bureau Drive Mailstop 8371 Gaithersburg, MD, 20899, USA. Fax: (301)417-1321; Tel: (301) 975-5395  
E-mail: marcela.najjarro@nist.gov

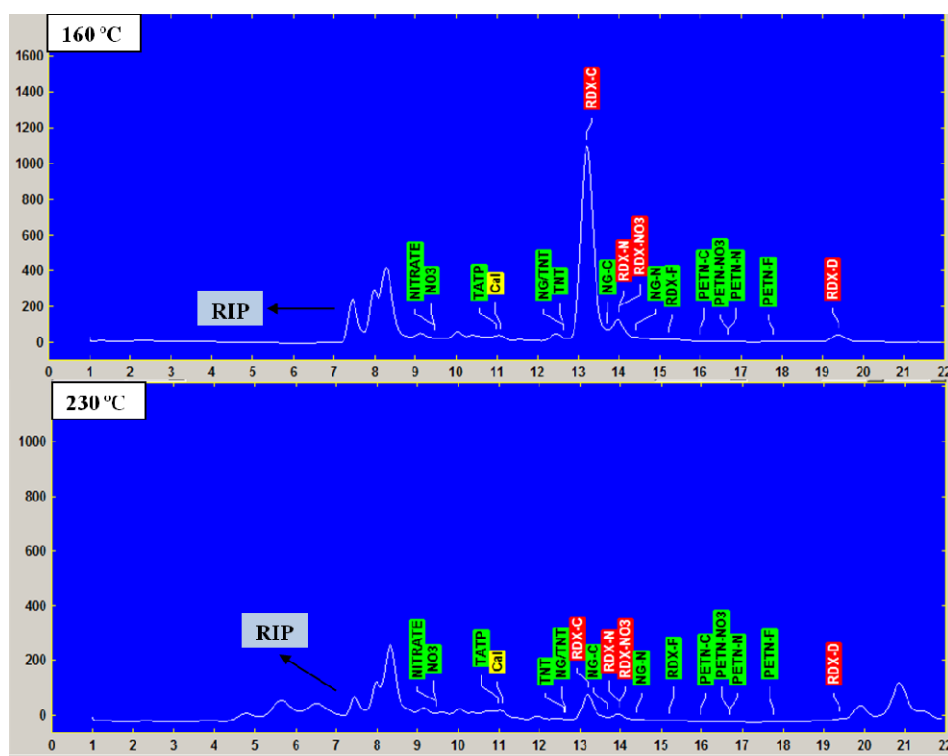

**Sup Fig 1.** Typical signal-to-noise backgrounds for RDX analysis at low and high desorption temperatures.

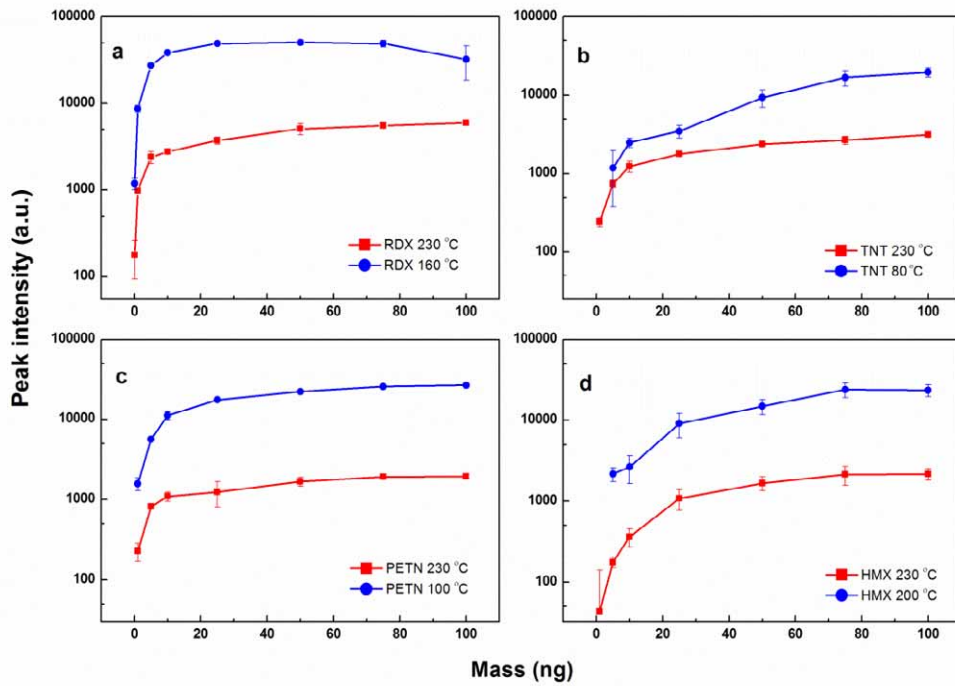

**Sup Fig 2a – d.** Response curves to standard desorber temperature versus optimized desorber temperature across the mass range of 0.1 ng to 100 ng; (a) RDX (b) TNT (c) PETN (d) HMX. An increase in sensitivity is observed across the operational range of the instrument validating the advantage of using lower temperatures to desorb the high explosives.

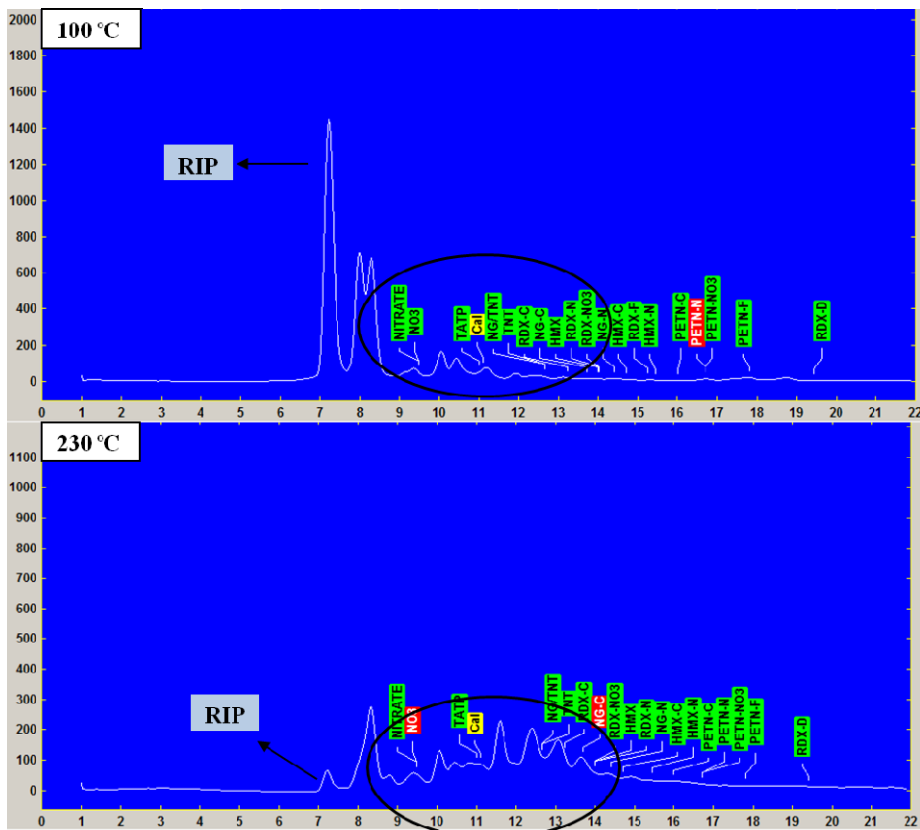

**Sup Fig 3.** Background contamination from manufacturer-supplied sample swabs at 100 °C and 230 °C desorber temperatures.

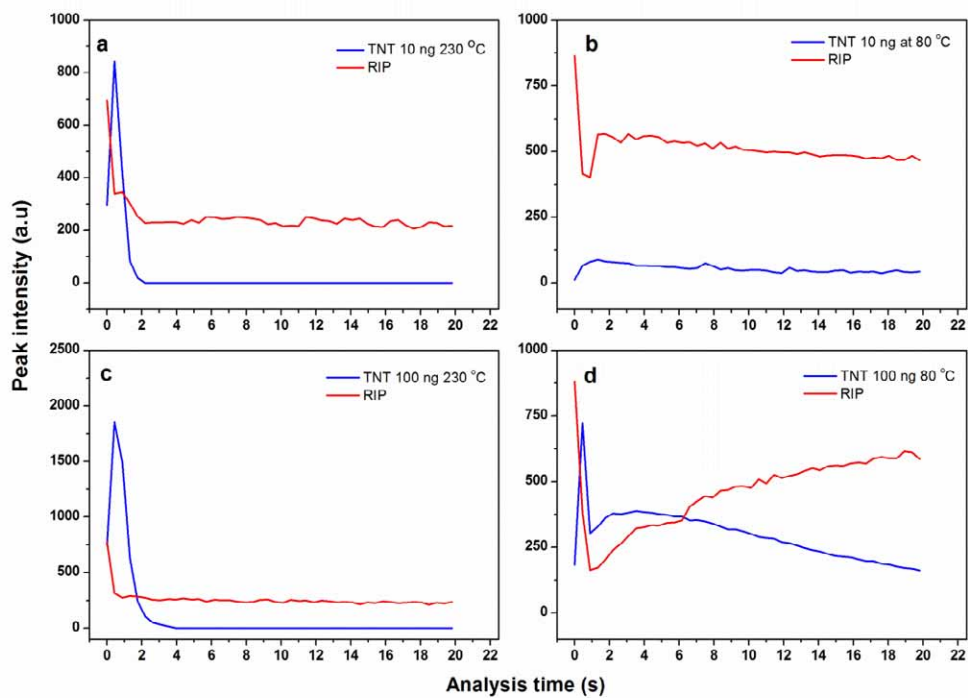

**Sup Fig 4 a – d.** Temporal profile for TNT and reactant ion peaks as a function of analyte concentration and desorption temperature; (a) 10 ng of TNT and 230 °C desorber temperature (b) 10 ng of TNT and 160 °C desorber temperature (c) 100 ng of TNT and 230 °C desorber temperature (d) 100 ng of TNT and 160 °C desorber temperature.
